# Supplementary material
Source: publisher figshare collection journal article supplement (https://plos.figshare.com/articles/dataset/_/1626974)
Supplement: Supplementary file [file 1]

**S1 Table: Life expectancies at ages zero, one and five, India and states, 1981 and 2009**

| India/States     | Year | Male    |         |         | Female  |         |         |
|------------------|------|---------|---------|---------|---------|---------|---------|
|                  |      | $e_0^0$ | $e_1^0$ | $e_5^0$ | $e_0^0$ | $e_1^0$ | $e_5^0$ |
| India            | 1981 | 54.6    | 60.3    | 59.8    | 54.5    | 60.2    | 61.2    |
|                  | 2009 | 64.9    | 67.2    | 64.0    | 68.1    | 70.8    | 68.1    |
| Andhra Pradesh   | 1981 | 55.2    | 59.9    | 58.5    | 58.5    | 62.6    | 61.5    |
|                  | 2009 | 63.9    | 66.1    | 62.4    | 68.4    | 71.0    | 67.4    |
| Assam            | 1981 | 52.6    | 57.8    | 57.5    | 52.3    | 57.0    | 57.1    |
|                  | 2009 | 61.0    | 63.8    | 61.0    | 63.4    | 66.6    | 64.3    |
| Bihar            | 1983 | 54.1    | 59.2    | 59.5    | 51.0    | 56.2    | 57.6    |
|                  | 2009 | 65.5    | 68.0    | 65.1    | 66.0    | 68.6    | 66.4    |
| Gujarat          | 1981 | 55.2    | 61.2    | 60.3    | 58.8    | 65.4    | 63.3    |
|                  | 2009 | 66.0    | 68.1    | 64.9    | 69.9    | 72.4    | 69.5    |
| Haryana          | 1981 | 58.9    | 63.8    | 61.7    | 58.4    | 64.3    | 63.7    |
|                  | 2009 | 65.1    | 67.3    | 64.0    | 70.1    | 73.0    | 69.9    |
| Himachal Pradesh | 1983 | 60.1    | 64.5    | 62.6    | 62.0    | 65.9    | 64.5    |
|                  | 2009 | 67.5    | 69.4    | 65.7    | 72.1    | 74.5    | 71.1    |
| Karnataka        | 1981 | 58.5    | 62.3    | 60.8    | 61.2    | 64.7    | 64.2    |
|                  | 2009 | 65.2    | 66.9    | 63.4    | 70.0    | 72.1    | 68.6    |
| Kerala           | 1981 | 64.7    | 66.4    | 63.8    | 69.6    | 71.0    | 68.3    |
|                  | 2009 | 71.4    | 71.2    | 67.4    | 77.2    | 77.2    | 73.4    |
| Madhya Pradesh   | 1981 | 50.3    | 57.5    | 58.6    | 50.2    | 56.9    | 59.8    |
|                  | 2009 | 61.7    | 65.0    | 62.2    | 64.8    | 68.5    | 66.2    |
| Maharashtra      | 1981 | 59.0    | 63.0    | 61.1    | 60.0    | 64.0    | 63.1    |
|                  | 2009 | 68.1    | 69.2    | 65.6    | 72.1    | 73.4    | 69.9    |
| Odisha           | 1981 | 52.6    | 60.0    | 58.9    | 51.5    | 58.5    | 58.5    |
|                  | 2009 | 62.9    | 66.2    | 63.5    | 64.4    | 67.9    | 65.3    |
| Punjab           | 1981 | 63.8    | 68.5    | 66.0    | 66.7    | 71.9    | 71.4    |
|                  | 2009 | 67.6    | 69.1    | 65.6    | 72.0    | 74.0    | 70.8    |
| Rajasthan        | 1981 | 53.6    | 58.9    | 59.3    | 53.9    | 59.2    | 61.4    |
|                  | 2009 | 65.4    | 68.3    | 65.1    | 69.3    | 72.7    | 70.4    |
| Tamil Nadu       | 1981 | 55.4    | 60.1    | 59.2    | 55.9    | 60.3    | 60.1    |
|                  | 2009 | 67.6    | 68.5    | 64.8    | 71.4    | 72.5    | 68.8    |
| Uttar Pradesh    | 1981 | 51.0    | 58.8    | 58.9    | 48.0    | 56.2    | 58.9    |
|                  | 2009 | 62.2    | 65.3    | 62.4    | 64.5    | 68.0    | 66.1    |
| West Bengal      | 1983 | 56.5    | 60.8    | 60.0    | 57.9    | 61.9    | 61.7    |
|                  | 2009 | 67.7    | 69.0    | 65.5    | 71.0    | 72.5    | 69.0    |
