# Supplementary material
Source: publisher figshare collection journal article supplement (https://plos.figshare.com/articles/dataset/_/1626974)
Supplement: Supplementary file [file 1]

**S2A Table: Levels of crossover between life expectancies at ages zero and five and corresponding  $({}_1q_0)$ , under-five  $({}_0q_5)$  and adult mortality  $({}_{45}q_{15})$ , various model life tables**

| Male                                      |         |         |                 |           |           |                 | Female  |         |                 |           |           |                 |
|-------------------------------------------|---------|---------|-----------------|-----------|-----------|-----------------|---------|---------|-----------------|-----------|-----------|-----------------|
|                                           | $e_0^0$ | $e_5^0$ | $e_0^0 - e_5^0$ | ${}_1q_0$ | ${}_0q_5$ | ${}_{45}q_{15}$ | $e_0^0$ | $e_5^0$ | $e_0^0 - e_5^0$ | ${}_1q_0$ | ${}_0q_5$ | ${}_{45}q_{15}$ |
| <b>Coale and Demeny model life tables</b> |         |         |                 |           |           |                 |         |         |                 |           |           |                 |
| <b>East</b>                               | 64.0    | 63.8    | 0.25            | 0.06      | 0.07      | 0.22            | 67.0    | 66.8    | 0.22            | 0.06      | 0.07      | 0.16            |
| <b>North</b>                              | 64.0    | 63.8    | 0.23            | 0.05      | 0.07      | 0.22            | 66.0    | 65.8    | 0.20            | 0.05      | 0.07      | 0.19            |
| <b>South</b>                              | 69.0    | 68.7    | 0.28            | 0.05      | 0.07      | 0.13            | 72.0    | 71.8    | 0.19            | 0.05      | 0.06      | 0.09            |
| <b>West</b>                               | 63.0    | 62.7    | 0.26            | 0.06      | 0.07      | 0.24            | 65.0    | 64.8    | 0.25            | 0.05      | 0.07      | 0.21            |
| <b>United Nations model life tables</b>   |         |         |                 |           |           |                 |         |         |                 |           |           |                 |
| <b>Chilean</b>                            | 65.0    | 64.9    | 0.10            | 0.06      | 0.07      | 0.22            | 70.0    | 69.9    | 0.07            | 0.06      | 0.07      | 0.14            |
| <b>Far East Asian</b>                     | 57.0    | 56.9    | 0.11            | 0.06      | 0.08      | 0.37            | 62.0    | 61.8    | 0.22            | 0.05      | 0.07      | 0.28            |
| <b>General</b>                            | 64.0    | 63.9    | 0.08            | 0.06      | 0.07      | 0.23            | 67.0    | 67.0    | 0.04            | 0.05      | 0.07      | 0.18            |
| <b>Latin</b>                              | 67.0    | 66.9    | 0.08            | 0.05      | 0.07      | 0.18            | 70.0    | 69.8    | 0.16            | 0.05      | 0.07      | 0.14            |
| <b>South Asian</b>                        | 69.0    | 68.8    | 0.22            | 0.05      | 0.07      | 0.14            | 72.0    | 71.7    | 0.30            | 0.05      | 0.06      | 0.09            |

**S2B Table: Levels of crossover between life expectancies at ages zero and one and corresponding infant ( ${}_1q_0$ ), under-five ( ${}_0q_5$ ) and adult mortality ( ${}_{45}q_{15}$ ), various model life tables**

| Male                                      |         |         |                 |           |           |                 | Female  |         |                 |           |           |                 |
|-------------------------------------------|---------|---------|-----------------|-----------|-----------|-----------------|---------|---------|-----------------|-----------|-----------|-----------------|
|                                           | $e_0^0$ | $e_1^0$ | $e_0^0 - e_1^0$ | ${}_1q_0$ | ${}_0q_5$ | ${}_{45}q_{15}$ | $e_0^0$ | $e_1^0$ | $e_0^0 - e_1^0$ | ${}_1q_0$ | ${}_0q_5$ | ${}_{45}q_{15}$ |
| <b>Coale and Demeny model life tables</b> |         |         |                 |           |           |                 |         |         |                 |           |           |                 |
| <b>East</b>                               | 75.0    | 75.0    | 0.04            | 0.01      | 0.01      | 0.10            | 81.0    | 81.0    | 0.05            | 0.01      | 0.01      | 0.05            |
| <b>North</b>                              | 79.0    | 78.9    | 0.06            | 0.01      | 0.01      | 0.08            | 81.0    | 81.0    | 0.03            | 0.01      | 0.02      | 0.06            |
| <b>South</b>                              | 84.0    | 84.0    | 0.05            | 0.01      | 0.01      | 0.03            | 87.0    | 86.9    | 0.07            | 0.01      | 0.01      | 0.02            |
| <b>West</b>                               | 75.0    | 74.9    | 0.06            | 0.01      | 0.01      | 0.10            | 78.0    | 78.0    | 0.03            | 0.01      | 0.02      | 0.07            |
| <b>United Nations model life tables</b>   |         |         |                 |           |           |                 |         |         |                 |           |           |                 |
| <b>Chilean</b>                            | 82.0    | 82.0    | 0.01            | 0.01      | 0.01      | 0.05            | 88.0    | 87.9    | 0.07            | 0.01      | 0.01      | 0.03            |
| <b>Far East Asian</b>                     | 74.0    | 73.9    | 0.09            | 0.01      | 0.01      | 0.11            | 82.0    | 82.0    | 0.04            | 0.01      | 0.01      | 0.06            |
| <b>General</b>                            | 81.0    | 80.9    | 0.07            | 0.01      | 0.01      | 0.06            | 85.0    | 85.0    | 0.03            | 0.01      | 0.01      | 0.03            |
| <b>Latin</b>                              | 82.0    | 82.0    | 0.00            | 0.01      | 0.02      | 0.05            | 85.0    | 85.0    | 0.02            | 0.01      | 0.02      | 0.04            |
| <b>South Asian</b>                        | 83.0    | 83.0    | 0.01            | 0.01      | 0.02      | 0.04            | 86.0    | 86.0    | 0.03            | 0.01      | 0.01      | 0.02            |
