# Supplementary material
Source: publisher figshare collection journal article supplement (https://plos.figshare.com/articles/dataset/_/1626974)
Supplement: Supplementary file [file 1]

**S4 Table: Components (in %) of change in gap between life expectancies at ages zero and five, India and States, 1981-09**

| India/States                 | 1981-85<br><5 / ≥5  | 1985-89<br><5 / ≥5   | 1989-93<br><5 / ≥5  | 1993-97<br><5 / ≥5   | 1997-01<br><5 / ≥5   | 2001-05<br><5 / ≥5   | 2005-09<br><5 / ≥5  |
|------------------------------|---------------------|----------------------|---------------------|----------------------|----------------------|----------------------|---------------------|
| <b>Relative share: Men</b>   |                     |                      |                     |                      |                      |                      |                     |
| <b>India</b>                 | <b>107.1 / -7.1</b> | <b>108.9 / -8.9</b>  | <b>106.9 / -6.9</b> | <b>104.7 / -4.7</b>  | <b>110.8 / -10.8</b> | <b>110.9 / -10.9</b> | <b>101.5 / -1.5</b> |
| <b>Orissa</b>                | 113.0 / -13.0       | 201.5 / -101.5       | 106.3 / -6.3        | 98.5 / 1.5           | 112.0 / -12.0        | 108.6 / -8.6         | 115.0 / -15.0       |
| <b>Gujarat</b>               | 106.0 / -6.0        | 95.6 / 4.4           | 112.3 / -12.3       | 119.6 / -19.6        | 104.7 / -4.7         | 107.8 / -7.8         | 110.6 / -10.6       |
| <b>Maharashtra</b>           | 104.2 / -4.2        | 108.6 / -8.6         | 107.1 / -7.1        | 98.6 / 1.4           | 106.7 / -6.7         | 110.1 / -10.1        | 107.1 / -7.1        |
| <b>Bihar</b>                 | - / -               | 123.2 / -23.2        | 108.5 / -8.5        | 97.1 / 2.9           | 130.2 / -30.2        | 50.5 / 49.5          | 105.4 / -5.4        |
| <b>West Bengal</b>           | - / -               | 109.5 / -9.5         | 102.3 / -2.3        | 104.9 / -4.9         | 117.1 / -17.1        | 102.8 / -2.8         | 104.2 / -4.2        |
| <b>Madhya Pradesh</b>        | 122.7 / -22.7       | 99.8 / 0.2           | 99.9 / 0.1          | 104.9 / -4.9         | 103.9 / -3.9         | 121.7 / -21.7        | 103.3 / -3.3        |
| <b>Tamil Nadu</b>            | 107.4 / -7.4        | 104.6 / -4.6         | 105.3 / -5.3        | 102.0 / -2.0         | 138.8 / -38.8        | 110.1 / -10.1        | 101.7 / -1.7        |
| <b>Rajasthan</b>             | 58.6 / 41.4         | 101.6 / -1.6         | 110.7 / -10.7       | 159.2 / -59.2        | 115.9 / -15.9        | 109.1 / -9.1         | 101.6 / -1.6        |
| <b>Kerala</b>                | 105.0 / -5.0        | 100.7 / -0.7         | 107.4 / -7.4        | 90.2 / 9.8           | 100.0 / 0.0          | 63.6 / 36.4          | 100.8 / -0.8        |
| <b>Assam</b>                 | 11.3 / 88.7         | 110.7 / -10.7        | 146.5 / -46.5       | 95.8 / 4.2           | 106.4 / -6.4         | -308.1 / 408.1       | 99.4 / 0.6          |
| <b>Karnataka</b>             | 35.9 / 64.1         | 122.3 / -22.3        | 98.3 / 1.7          | 104.3 / -4.3         | 138.2 / -38.2        | 104.5 / -4.5         | 99.0 / 1.0          |
| <b>Uttar Pradesh</b>         | 94.4 / 5.6          | 111.6 / -11.6        | 104.4 / -4.4        | 122.5 / -22.5        | 105.7 / -5.7         | 106.0 / -6.0         | 97.5 / 2.5          |
| <b>Andhra Pradesh</b>        | 129.2 / -29.2       | 87.7 / 12.3          | 112.4 / -12.4       | 105.9 / -5.9         | 106.1 / -6.1         | 111.9 / -11.9        | 97.4 / 2.6          |
| <b>Punjab</b>                | 92.9 / 7.1          | 102.9 / -2.9         | 104.2 / -4.2        | 79.5 / 20.5          | 113.7 / -13.7        | 110.6 / -10.6        | 94.4 / 5.6          |
| <b>Himachal Pradesh</b>      | - / -               | 99.9 / 0.1           | 88.5 / 11.5         | 133.8 / -33.8        | 131.1 / -31.1        | 99.6 / 0.4           | 92.9 / 7.1          |
| <b>Haryana</b>               | 137.8 / -37.8       | 97.6 / 2.4           | 116.1 / -16.1       | 136.2 / -36.2        | 92.1 / 7.9           | 108.8 / -8.8         | 88.3 / 11.7         |
| <b>Relative share: Women</b> |                     |                      |                     |                      |                      |                      |                     |
| <b>India</b>                 | <b>107.2 / -7.2</b> | <b>114.3 / -14.3</b> | <b>109.9 / -9.9</b> | <b>115.2 / -15.2</b> | <b>112.5 / -12.5</b> | <b>117.2 / -17.2</b> | <b>108.5 / -8.5</b> |
| <b>Madhya Pradesh</b>        | 106.9 / -6.9        | 116.9 / -16.9        | 104.2 / -4.2        | 109.9 / -9.9         | 128.4 / -28.4        | 112.9 / -12.9        | 111.9 / -11.9       |
| <b>Rajasthan</b>             | 77.6 / 22.4         | 104.0 / -4.0         | 114.7 / -14.7       | 0.0 / 100.0          | 110.3 / -10.3        | 108.2 / -8.2         | 111.0 / -11.0       |
| <b>Bihar</b>                 | - / -               | 134.2 / -34.2        | 108.7 / -8.7        | 104.3 / -4.3         | 126.8 / -26.8        | 154.7 / -54.7        | 110.4 / -10.4       |
| <b>Orissa</b>                | 103.6 / -3.6        | -0.4 / 100.4         | 147.5 / -47.5       | 103.9 / -3.9         | 120.5 / -20.5        | 117.7 / -17.7        | 108.2 / -8.2        |
| <b>Uttar Pradesh</b>         | 93.0 / 7.0          | 127.5 / -27.5        | 114.1 / -14.1       | 107.4 / -7.4         | 106.5 / -6.5         | 123.6 / -23.6        | 108.0 / -8.0        |
| <b>Kerala</b>                | 118.6 / -18.6       | 99.7 / 0.3           | 105.2 / -5.2        | 117.5 / -17.5        | 103.1 / -3.1         | 86.4 / 13.6          | 107.0 / -7.0        |
| <b>Tamil Nadu</b>            | 167.1 / -67.1       | 105.2 / -5.2         | 109.6 / -9.6        | 106.6 / -6.6         | 123.2 / -23.2        | 107.8 / -7.8         | 105.3 / -5.3        |
| <b>Gujarat</b>               | 131.0 / -31.0       | 60.3 / 39.7          | 111.0 / -11.0       | 203.6 / -103.6       | 120.2 / -20.2        | 107.5 / -7.5         | 104.1 / -4.1        |
| <b>West Bengal</b>           | - / -               | 96.1 / 3.9           | 142.5 / -42.5       | 105.8 / -5.8         | 115.6 / -15.6        | 113.9 / -13.9        | 102.9 / -2.9        |
| <b>Maharashtra</b>           | 122.8 / -22.8       | 105.4 / -5.4         | 103.0 / -3.0        | 111.7 / -11.7        | 121.9 / -21.9        | 114.7 / -14.7        | 102.6 / -2.6        |
| <b>Karnataka</b>             | 20.4 / 79.6         | 109.6 / -9.6         | 103.0 / -3.0        | 99.7 / 0.3           | 132.9 / -32.9        | 105.5 / -5.5         | 100.9 / -0.9        |
| <b>Punjab</b>                | 78.8 / 21.2         | 98.1 / 1.9           | 106.5 / -6.5        | 147.6 / -47.6        | -5.7 / 105.7         | 112.5 / -12.5        | 100.2 / -0.2        |
| <b>Andhra Pradesh</b>        | 125.5 / -25.5       | 103.2 / -3.2         | 104.7 / -4.7        | 300.9 / -200.9       | 106.9 / -6.9         | 128.2 / -28.2        | 96.9 / 3.1          |
| <b>Haryana</b>               | 128.3 / -28.3       | 116.3 / -16.3        | 103.5 / -3.5        | -248.1 / 348.1       | 128.3 / -28.3        | 114.9 / -14.9        | 94.9 / 5.1          |
| <b>Himachal Pradesh</b>      | - / -               | 131.8 / -31.8        | 152.7 / -52.7       | -27.2 / 127.2        | 108.1 / -8.1         | 73.8 / 26.2          | 84.3 / 15.7         |
| <b>Assam</b>                 | 153.9 / -53.9       | 118.4 / -18.4        | 121.7 / -21.7       | 104.7 / -4.7         | 137.4 / -37.4        | 114.9 / -14.9        | -66.0 / 166         |

**Note:** Arranged in descending order of "Below age five" component in the period 2005-09.
