# Supplementary material
Source: publisher figshare collection journal article supplement (https://plos.figshare.com/articles/dataset/_/1626974)
Supplement: Supplementary file [file 1]

## S1A Appendix: Condition for the crossover in life expectancies: Estimating threshold levels of infant and under-five mortality

The derivation of the mathematical condition, using life table functions, to understand the level of infant and under-five mortality at time of crossover e.g. when  $(e_0^0 \geq e_1^0)$  and  $(e_0^0 \geq e_5^0)$  are given below:

A simple mathematical relation is derived from a basic definition of life expectancy given as:

$$e_x^0(t) = \frac{\int_x^w l(a, t) da}{l(x, t)}$$

Let  $l(0, t) = 1$

$$e_0^0(t) = \int_0^1 l(x, t) dx + \int_1^w l(x, t) dx$$

$$e_0^0 = {}_1L_0 + e_1^0 [1 - {}_1d_0] \quad (1)$$

Now, we have,

$$\begin{aligned} {}_nL_x &= {}_nl_{x+n} + {}_nA_x \\ &= {}_nl_{x+n} + {}_na_{x:n}d_x \end{aligned} \quad (2)$$

For the age group 0-1, equation (2) can be written as

$${}_1L_0 = {}_1l_1 + {}_1a_{0:1}d_0 \quad (3)$$

Now, from equation (1) we get

$$e_0^0 = {}_1L_0 + e_1^0 [1 - {}_1d_0]$$

$$= [l_1 +_1 a_0 \text{ }_1 d_0] + e_1^0 - e_1^0 \text{ }_1 d_0 \quad (\text{Using equation 3})$$

$$= l_1 +_1 a_0 (l_0 - l_1) + e_1^0 - e_1^0 (l_0 - l_1)$$

$$= l_1 +_1 a_0 l_0 \text{ }_1 a_0 l_1 + e_1^0 - e_1^0 l_0 + e_1^0 l_1$$

For simplification let  $l_0 = 1$

$$\begin{aligned} e_0^0 &= l_1 +_1 a_0 \text{ }_1 a_0 l_1 + e_1^0 l_1 \\ &= \text{ }_1 a_0 + l_1 (1 + e_1^0 \text{ }_1 a_0) \\ &= \text{ }_1 a_0 + (1 \text{ }_1 q_0)(1 + e_1^0 \text{ }_1 a_0) \end{aligned} \quad (l_1 = 1 \text{ }_1 q_0)$$

For crossover,

$$e_0^0 \geq e_1^0$$

$$\text{ }_1 a_0 + (1 \text{ }_1 q_0)(1 + e_1^0 \text{ }_1 a_0) \geq e_1^0$$

$$\text{ }_1 q_0 \leq \frac{1}{(e_1^0 + 1 \text{ }_1 a_0)}$$

Hence if IMR is less than or equal to  $\frac{1}{(e_1^0 + 1 \text{ }_1 a_0)}$  then only  $e_0^0$  will be greater than equal to  $e_1^0$ .

Similarly we can also write equation 1 as follows:

$$e_0^0(t) = \int_0^5 l(x, t) dx + \int_5^w l(x, t) dx$$

$$e_0^0 = {}_5L_0 + e_5^0 [1 - {}_5d_0]$$

$$= [5l_5 + {}_5a_0 {}_5d_0] + e_5^0 - e_5^0 {}_5d_0 \quad (\text{Using equation 2})$$

$$= 5l_5 + {}_5a_0 (l_0 - l_5) + e_5^0 - e_5^0 (l_0 - l_5)$$

$$= 5l_5 + {}_5a_0 l_0 - {}_5a_0 l_5 + e_5^0 - e_5^0 l_0 + e_5^0 l_5$$

For simplification let  $l_0 = 1$

$$e_0^0 = 5l_5 + {}_5a_0 - {}_5a_0 l_5 + e_5^0 l_5$$

$$= {}_5a_0 + l_5 (5 + e_5^0 - {}_5a_0)$$

$$= {}_5a_0 + (1 - {}_5q_0)(5 + e_5^0 - {}_5a_0) \quad (l_5 = 1 - {}_5q_0)$$

For crossover,

$$e_0^0 \geq e_5^0$$

$${}_5a_0 + (1 - {}_5q_0)(5 + e_5^0 - {}_5a_0) \geq e_1^0$$

$${}_5q_0 \leq \frac{5}{(e_5^0 + 5 - {}_5a_0)}$$

Hence if under-five mortality is less than or equal to  $\frac{5}{(e_5^0 + 5 - {}_5a_0)}$  then only  $e_0^0$  will be greater

than equal to  $e_5^0$ .
