# Supplementary material
Source: publisher figshare collection journal article supplement (https://plos.figshare.com/articles/dataset/_/1626974)
Supplement: Supplementary file [file 1]

**S3 Table: Components (in %) of change in gap between life expectancies at ages zero and one, India and States, 1981-09**

| India/States                 | 1981-85<br><1 / ≥1   | 1985-89<br><1 / ≥1   | 1989-93<br><1 / ≥1   | 1993-97<br><1 / ≥1   | 1997-01<br><1 / ≥1   | 2001-05<br><1 / ≥1   | 2005-09<br><1 / ≥1   |
|------------------------------|----------------------|----------------------|----------------------|----------------------|----------------------|----------------------|----------------------|
| <b>Relative share: Men</b>   |                      |                      |                      |                      |                      |                      |                      |
| <b>India</b>                 | <b>113.4 / -13.4</b> | <b>121.3 / -21.3</b> | <b>119.0 / -19.0</b> | <b>120.3 / -20.3</b> | <b>120.4 / -20.4</b> | <b>112.7 / -12.7</b> | <b>104.6 / -4.6</b>  |
| <b>Gujarat</b>               | 111.3 / -11.3        | 99.5 / 0.5           | 118.4 / -18.4        | 230.9 / -130.9       | 111.4 / -11.4        | 109.7 / -9.7         | 116.6 / -16.6        |
| <b>Orissa</b>                | 118.8 / -18.8        | 156.4 / -56.4        | 113.2 / -13.2        | 107.3 / -7.3         | 111.7 / -11.7        | 111.2 / -11.2        | 115.5 / -15.5        |
| <b>Punjab</b>                | 118.8 / -18.8        | 156.4 / -56.4        | 113.2 / -13.2        | 107.3 / -7.3         | 111.7 / -11.7        | 111.2 / -11.2        | 115.5 / -15.5        |
| <b>Madhya Pradesh</b>        | 134.3 / -34.3        | 114.5 / -14.5        | 123.6 / -23.6        | 126.9 / -26.9        | 107.5 / -7.5         | 125.4 / -25.4        | 109.4 / -9.4         |
| <b>Bihar</b>                 | - / -                | 148.8 / -48.8        | 120.5 / -20.5        | 151.1 / -51.1        | 167.2 / -67.2        | 50.7 / 49.3          | 107.9 / -7.9         |
| <b>Rajasthan</b>             | 62.1 / 37.9          | 111.7 / -11.7        | 220.6 / -120.6       | 2266.7 / -2166.7     | 165.6 / -65.6        | 111.1 / -11.1        | 105.8 / -5.8         |
| <b>Maharashtra</b>           | 107.9 / -7.9         | 124.8 / -24.8        | 116.3 / -16.3        | 101.5 / -1.5         | 110.8 / -10.8        | 110.7 / -10.7        | 104.5 / -4.5         |
| <b>West Bengal</b>           | - / -                | 158.3 / -58.3        | 108.6 / -8.6         | 123.8 / -23.8        | 136.3 / -36.3        | 103.8 / -3.8         | 104.2 / -4.2         |
| <b>Assam</b>                 | 12.9 / 87.1          | 134.1 / -34.1        | 132.3 / -32.3        | 106.3 / -6.3         | 123.7 / -23.7        | -303.6 / 403.6       | 102.5 / -2.5         |
| <b>Kerala</b>                | 106.8 / -6.8         | 103.8 / -3.8         | 109.4 / -9.4         | 92.7 / 7.3           | 101.6 / -1.6         | 62.1 / 37.9          | 102.4 / -2.4         |
| <b>Tamil Nadu</b>            | 112.9 / -12.9        | 119.7 / -19.7        | 118.4 / -18.4        | 108.0 / -8.0         | 147.0 / -47.0        | 110.8 / -10.8        | 102.2 / -2.2         |
| <b>Uttar Pradesh</b>         | 100.9 / -0.9         | 112.7 / -12.7        | 112.2 / -12.2        | 169.7 / -69.7        | 133.1 / -33.1        | 108.6 / -8.6         | 101.3 / -1.3         |
| <b>Karnataka</b>             | 37.3 / 62.7          | 72.8 / 27.2          | 107.3 / -7.3         | 107.8 / -7.8         | 64.3 / 35.7          | 105.5 / -5.5         | 99.8 / 0.2           |
| <b>Andhra Pradesh</b>        | 134.9 / -34.9        | 83.0 / 17.0          | 129.0 / -29.0        | 117.8 / -17.8        | 187.8 / -87.8        | 112.7 / -12.7        | 98.2 / 1.8           |
| <b>Himachal Pradesh</b>      | - / -                | 109.0 / -9.0         | 84.8 / 15.2          | 160.0 / -60.0        | 138.9 / -38.9        | 100.1 / -0.1         | 93.5 / 6.5           |
| <b>Haryana</b>               | 142.1 / -42.1        | 100.5 / -0.5         | 113.3 / -13.3        | 253.7 / -153.7       | 93.2 / 6.8           | 109.7 / -9.7         | 89.9 / 10.1          |
| <b>Relative share: Women</b> |                      |                      |                      |                      |                      |                      |                      |
| <b>India</b>                 | <b>116.2 / -16.2</b> | <b>129.9 / -29.9</b> | <b>131.3 / -31.3</b> | <b>171.3 / -71.3</b> | <b>150.8 / -50.8</b> | <b>119.9 / -19.9</b> | <b>112.5 / -12.5</b> |
| <b>Assam</b>                 | 165.8 / -65.8        | 133.5 / -33.5        | 128.0 / -28.0        | -1142.9 / 1242.9     | 26.2 / 73.8          | 117.9 / -17.9        | 338.3 / -238.3       |
| <b>Madhya Pradesh</b>        | 120.7 / -20.7        | -69.5 / 169.5        | 136.4 / -36.4        | 142.7 / -42.7        | 268.3 / -168.3       | 117.2 / -17.2        | 124.2 / -24.2        |
| <b>Kerala</b>                | 120.5 / -20.5        | 101.7 / -1.7         | 107.8 / -7.8         | 134.8 / -34.8        | 107.8 / -7.8         | 86.9 / 13.1          | 123.1 / -23.1        |
| <b>Uttar Pradesh</b>         | 104.5 / -4.5         | 130.6 / -30.6        | 135.9 / -35.9        | 128.3 / -28.3        | 159.7 / -59.7        | 129.0 / -29.0        | 114.3 / -14.3        |
| <b>Bihar</b>                 | - / -                | 133.6 / -33.6        | 121.4 / -21.4        | 205.5 / -105.5       | 639.6 / -539.6       | 158.5 / -58.5        | 110.7 / -10.7        |
| <b>Orissa</b>                | 110.6 / -10.6        | -552.2 / 652.2       | 123.5 / -23.5        | 146.6 / -46.6        | 135.7 / -35.7        | 120.6 / -20.6        | 110.4 / -10.4        |
| <b>Punjab</b>                | 82.4 / 17.6          | 101.2 / -1.2         | 196.2 / -96.2        | 695.2 / -595.2       | 161.9 / -61.9        | 114.1 / -14.1        | 101.1 / -1.1         |
| <b>West Bengal</b>           | - / -                | 110.5 / -10.5        | 466.1 / -366.1       | 112.3 / -12.3        | 148.1 / -48.1        | 115.3 / -15.3        | 108.4 / -8.4         |
| <b>Gujarat</b>               | 134.7 / -34.7        | 86.1 / 13.9          | 116.3 / -16.3        | -20.5 / 120.5        | -80.8 / 180.8        | 109.6 / -9.6         | 107.6 / -7.6         |
| <b>Tamil Nadu</b>            | 179.0 / -79.0        | 124.3 / -24.3        | 128.6 / -28.6        | 306.9 / -206.9       | 121.4 / -21.4        | 108.5 / -8.5         | 106.7 / -6.7         |
| <b>Rajasthan</b>             | 86.1 / 13.9          | 123.1 / -23.1        | 289.6 / -189.6       | 47.5 / 52.5          | 187.1 / -87.1        | 110.8 / -10.8        | 106.1 / -6.1         |
| <b>Karnataka</b>             | 24.5 / 75.5          | 49.1 / 50.9          | 147.0 / -47.0        | 102.9 / -2.9         | 677.8 / -577.8       | 106.8 / -6.8         | 103.6 / -3.6         |
| <b>Maharashtra</b>           | 128.6 / -28.6        | 113.8 / -13.8        | 128.4 / -28.4        | 132.1 / -32.1        | 322.6 / -222.6       | 116.0 / -16.0        | 103.0 / -3.0         |
| <b>Andhra Pradesh</b>        | 131.6 / -31.6        | 117.4 / -17.4        | 126.3 / -26.3        | 26.2 / 73.8          | 136.3 / -36.3        | 128.9 / -28.9        | 98.5 / 1.5           |
| <b>Haryana</b>               | 135.3 / -35.3        | 118.7 / -18.7        | 104.1 / -4.1         | 44.0 / 56.0          | -370.5 / 470.5       | 117.2 / -17.2        | 97.2 / 2.8           |
| <b>Himachal Pradesh</b>      | - / -                | -214.1 / 314.1       | 180.1 / -80.1        | -9.0 / 109.0         | 111.2 / -11.2        | 74.4 / 25.6          | 82.2 / 17.8          |

**Note:** Arranged in descending order of "Below age one" component in the period 2005-09.
